# Supplementary material for: Functionalized Soybean Oil- and Vanillin-Based Dual Cure Photopolymerizable System for Light-Based 3D Structuring
Source: MDPI journal article supplement (doi:10.3390/polym14245361), 2022-12-08
Supplement: s1 [file s1]

Article

# Functionalized Soybean Oil- and Vanillin-Based Dual-Cure Photopolymerizable System for Light-Based 3D Structuring

Vilte Sereikaite<sup>1</sup>, Aukse Navaruckiene<sup>1</sup>, Justinas Jaras<sup>1</sup>, Edvinas Skliutas<sup>2</sup>, Dimitra Ladika<sup>3</sup>, David Gray<sup>3</sup>, Mangirdas Malinauskas<sup>2</sup>, Vaidas Talacka<sup>4</sup> and Jolita Ostrauskaite<sup>1,\*</sup>

<sup>1</sup> Department of Polymer Chemistry and Technology, Kaunas University of Technology, Radvilenu Rd. 19, LT-50254 Kaunas, Lithuania

<sup>2</sup> Laser Research Center, Faculty of Physics, Vilnius University, Sauletekis Ave. 10, LT-10223 Vilnius, Lithuania

<sup>3</sup> Institute of Electronic Structure and Laser, Foundation for Research and Technology – Hellas, 70013 Heraklion, Greece

<sup>4</sup> AmeraLabs, Kęstučio Str. 6A, LT-44320 Kaunas, Lithuania

\* Correspondence: jolita.ostrauskaite@ktu.lt (J.O.); Tel.: +370-37-300192

**Citation:** Sereikaite, V.; Navaruckiene, A.; Jaras, J.; Skliutas, E.; Ladika, D.; Gray, D.; Malinauskas, M.; Talacka, V.; Ostrauskaite, J. Functionalized Soybean Oil- and Vanillin-Based Dual Cure Photopolymerizable System for Light-Based 3D Structuring. *Polymers* **2022**, *14*, 5361.

<https://doi.org/10.3390/polym14245361>

Academic Editor: Arpan Biswas

Received: 18 November 2022

Accepted: 6 December 2022

Published: 8 December 2022

**Publisher's Note:** MDPI stays neutral with regard to jurisdictional claims in published maps and institutional affiliations.

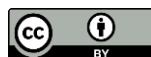

**Copyright:** © 2022 by the authors. Submitted for possible open access publication under the terms and conditions of the Creative Commons Attribution (CC BY) license (<https://creativecommons.org/licenses/by/4.0/>).

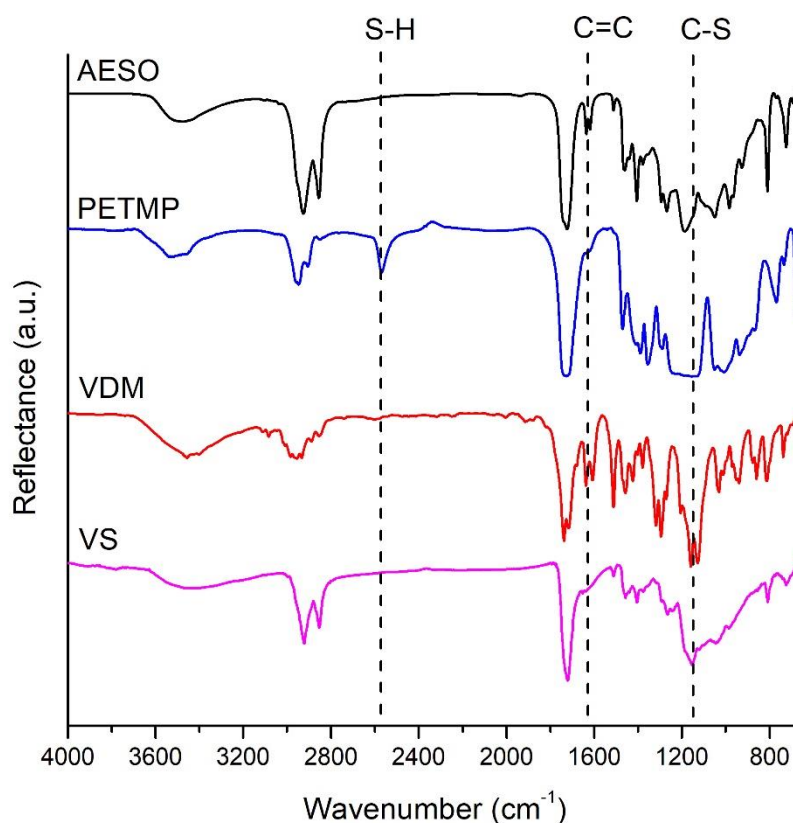

**Figure S1.** FT-IR spectra of AESO, PETMP, VDM, and the polymer VS

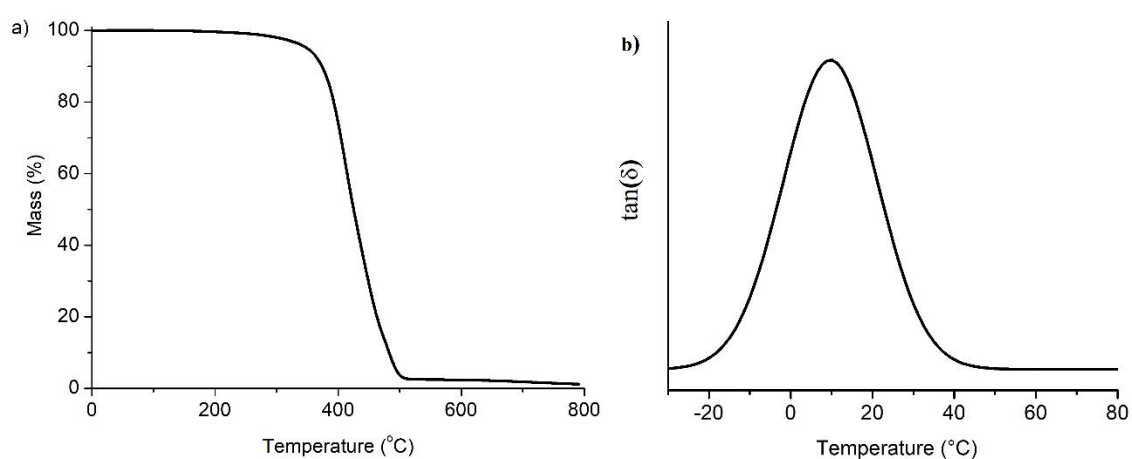

**Figure S2.** Thermogravimetric curve (a) and DMTA thermogram (b) of the polymer VS.

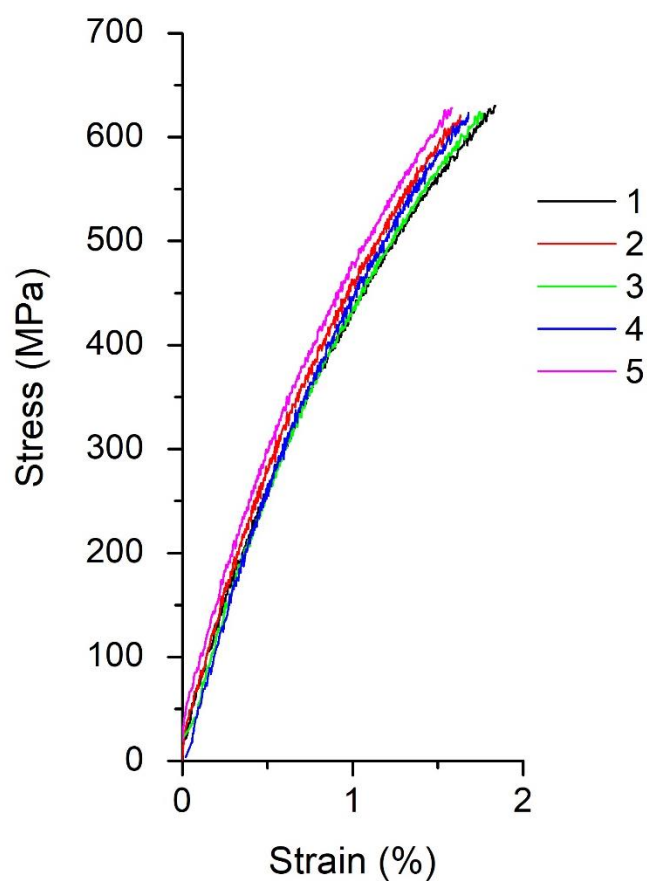

**Figure S3.** Tensile stress-strain curves of cross-linked polymer (samples 1-5).

**Table S1.** Mechanical characteristics of the cross-linked polymers

| Polymer              | Young's modulus, MPa | Tensile strength, MPa | Elongation at break, % | Compression modulus, MPa |
|----------------------|----------------------|-----------------------|------------------------|--------------------------|
| VS                   | 4753.10 ± 175.20     | 88.54 ± 4.26          | 4.72 ± 0.49            | 1633.72 ± 78.74          |
| VDM/THIOL (2:2) [15] | 1.4 ± 0.2            | 0.02 ± 0.0            | 19.0 ± 3.2             | -*                       |
| VDM/THIOL (2:1) [15] | 3952.3 ± 52.3        | 177.9 ± 11.6          | 9.7 ± 0.3              | -                        |
| AESO [25]            | 279 ± 3              | 5.39 ± 1.01           | 1.6 ± 0.36             | 359 ± 20                 |
| AESO/VDM (1:1) [31]  | -                    | -                     | -                      | 9.9 ± 0.2                |
| VDM/THIOL (1:1) [30] | -                    | -                     | -                      | 0.70 ± 0.02              |

\* - not reported
